# Supplementary material
Source: PubMed Central journal article supplement (PMC3159089)
Supplement: supp_43_6_720__1.pdf [file supp_43_6_720__1.pdf]

## Online Data Supplement

### Genetic Influences on Asthma Susceptibility in Developing Lung

Nicole Carpe\*<sup>1,2</sup>; Isabel Mandeville\*<sup>2</sup>; Leslie Ribeiro<sup>1,2</sup>; Andre Ponton<sup>3</sup>; James G. Martin<sup>4</sup>; Alvin T. Kho<sup>5</sup>; Jen-Hwa Chu<sup>6</sup>; Kelan Tantisira<sup>6,7</sup>; Scott T Weiss<sup>6</sup>; Benjamin A. Raby<sup>6,7</sup> and Feige Kaplan<sup>1,2,8,9</sup>

1. Department of Human Genetics, McGill University, Montreal, Quebec, Canada H3A 1B1
2. McGill University - Montreal Children's Hospital Research Institute, Montreal, QC, Canada, H3Z 2Z3
3. McGill University and Genome Quebec Innovation Centre, Montreal, QC, Canada
4. Meakins Christie Laboratories, McGill University, Montreal, QC, Canada
5. Children's Hospital Informatics Program, Harvard-MIT Division of Health Sciences and Technology, Children's Hospital Boston, Boston, MA, United States
6. Channing Laboratory, Center for Genomic Medicine, Harvard Medical School, Boston, MA, United States
7. Division of Pulmonary and Critical Care Medicine, Harvard Medical School, Boston, MA, United States
8. Department of Pediatrics, McGill University, Montreal, QC, Canada, H3Z 2Z3
9. Corresponding author

Figure E1. The Venn diagrams show overlapping patterns of gene expression when BN or Fisher rat is compared to Lewis rat at PN1, PN7 and PN14. Fold change limits set at  $>+2$  or  $<-2$ ,  $p<0.05$ , all comparisons.
