# Supplementary material
Source: PubMed Central journal article supplement (PMC3159089)
Supplement: supp_43_6_720__2.pdf [file supp_43_6_720__2.pdf]

**A**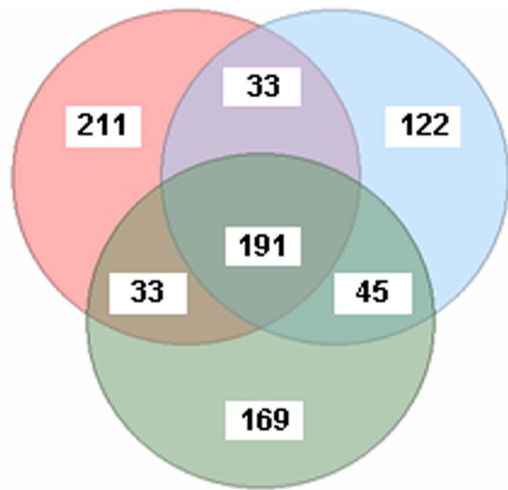

● Gene list (PN1 Fisher vs Lewis)  
● Gene list (PN7 Fisher vs Lewis)  
● Gene list (PN14 Fisher vs Lewis)

**B**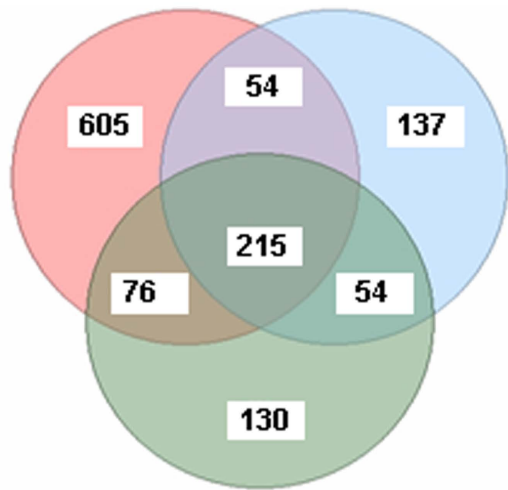

● Gene list (PN1 BN vs Lewis)  
● Gene list (PN7 BN vs Lewis)  
● Gene list (PN14 BN vs Lewis)
